# Supplementary material for: From spheres to worms to vesicles: kinetic control of nanostructure formation from the same block copolymer
Source: Royal Society of Chemistry journal article supplement (doi:10.1039/d5py01038a), 2025-12-16
Supplement: d5py01038a1.pdf [file d5py01038a1.pdf]

## Supporting Information

# From Spheres to Worms to Vesicles: Kinetic Control of Nanostructure Formation from the Same Block Copolymer

*Juliane Eberhardt,<sup>a,b</sup> Stephanie Hoeppener,<sup>c,d</sup> Ulrich Mansfeld,<sup>b</sup> Johannes C. Brendel,<sup>a,b,\*</sup>*

<sup>a</sup>Macromolecular Chemistry I, University of Bayreuth, Universitätsstr. 30, 95447 Bayreuth,  
Germany.

<sup>b</sup>Institute of Macromolecular Research (BIMF) and Bavarian Polymer Institute (BPI),  
University of Bayreuth, Universitätsstr. 30, 95447 Bayreuth, Germany.

<sup>c</sup>Laboratory of Organic and Macromolecular Chemistry (IOMC), Friedrich Schiller University  
Jena, Humboldtstr. 10, 07743 Jena, Germany.

<sup>d</sup>Jena Center for Soft Matter (JCSM), Friedrich Schiller University Jena, Philosophenweg 7,  
07743 Jena, Germany.

Correspondence to J. C. Brendel ([johannes.brendel@uni-bayreuth.de](mailto:johannes.brendel@uni-bayreuth.de))

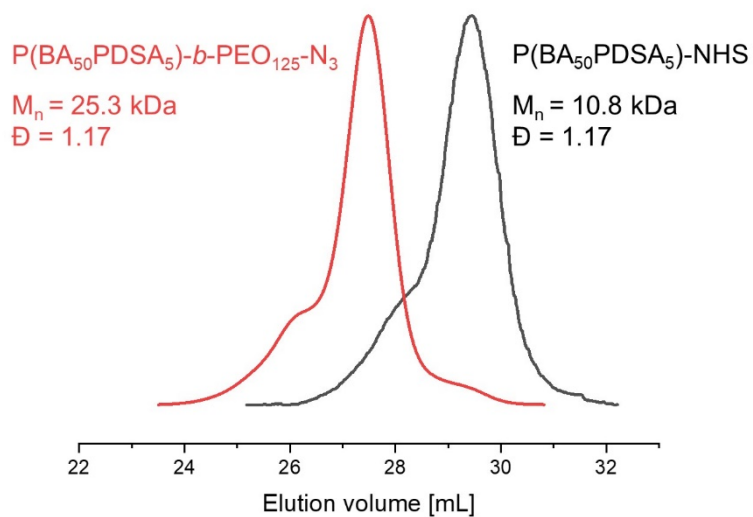

Figure S1: GPC measurements of P(BA<sub>50</sub>-PDSA<sub>5</sub>)-b-PEO<sub>125</sub>-N<sub>3</sub> and P(BA<sub>50</sub>-PDSA<sub>5</sub>)-NHS (Eluent: DMAc + LiBr, PS-calibration, RI detector).

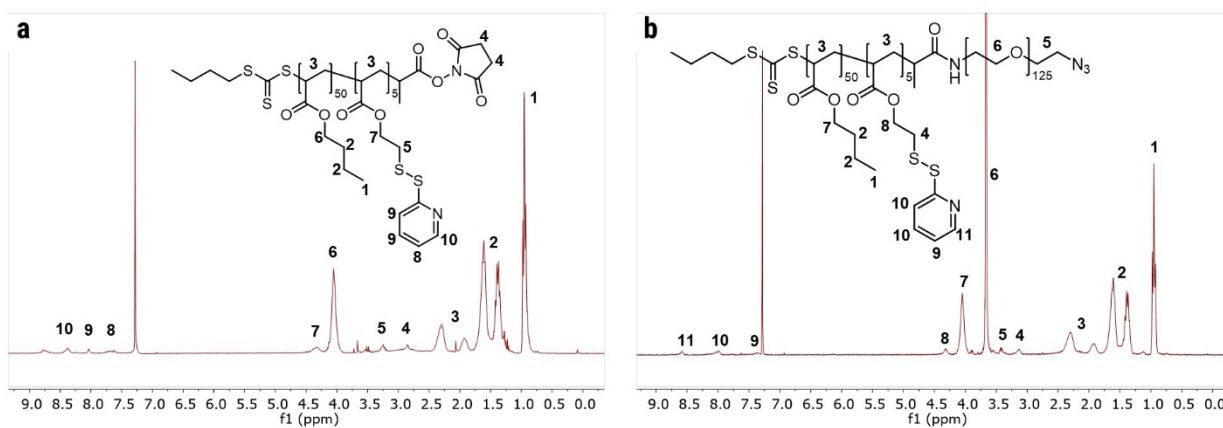

Figure S2: <sup>1</sup>H-NMR (300 MHz) spectra of a) P(BA<sub>50</sub>-PDSA<sub>5</sub>)-NHS and b) P(BA<sub>50</sub>-PDSA<sub>5</sub>)-b-PEO<sub>125</sub>-N<sub>3</sub> in CDCl<sub>3</sub>.

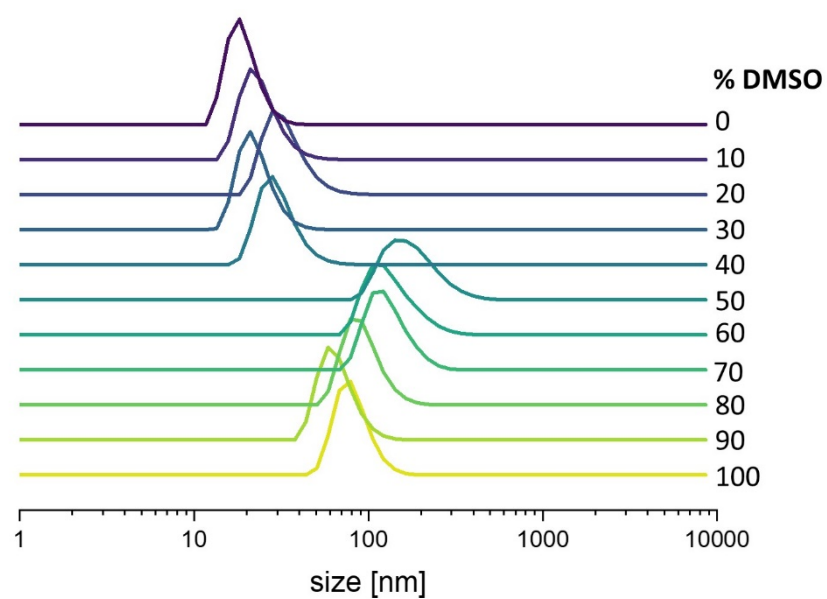

Figure S3: DLS measurements (number PSD), indicating particle size distributions with increasing DMSO content (0% to 100%) in starting solvent composition. Initial polymer concentration: 4 mg/mL, water addition rate: 2 mL/h.

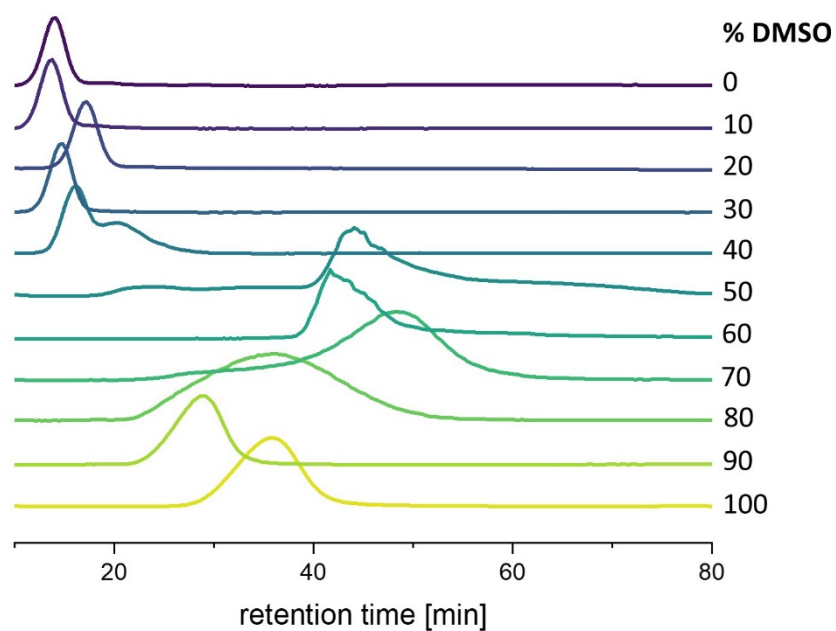

Figure S4: AF4 elugrams (UV detector at 280 nm) with increasing DMSO content (0% to 100%) in starting solvent composition. Initial polymer concentration: 4 mg/mL, water addition rate: 2 mL/h.

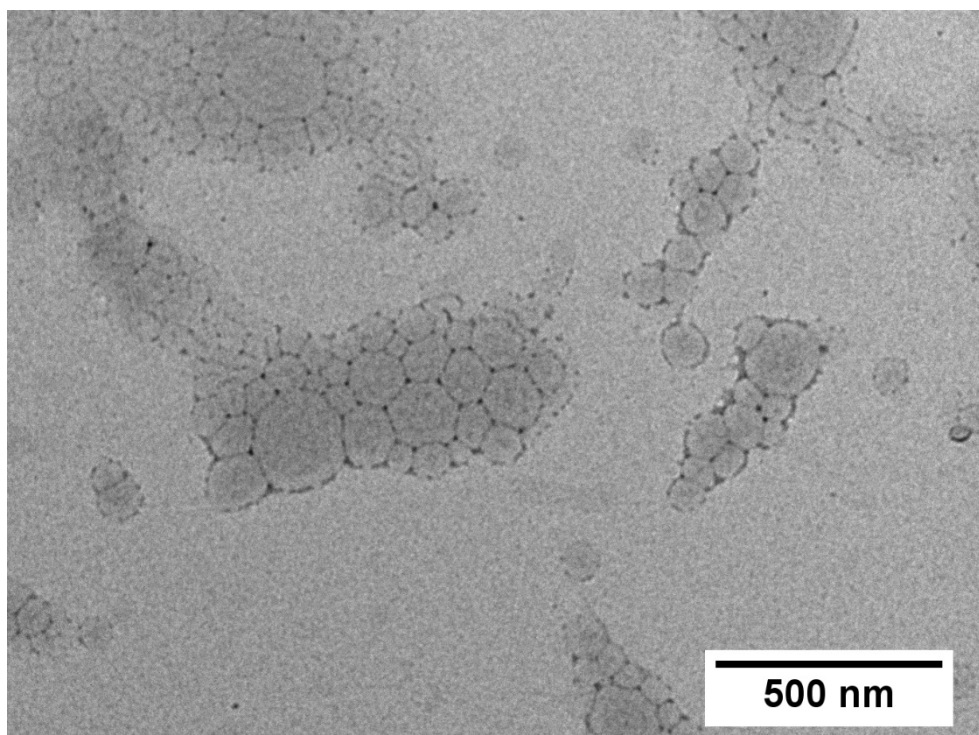

Figure S5: Non-cryo-TEM image from sample prepared with 4 mg/mL initial polymer concentration, 2 mL/h water addition speed and a solvent ratio of 80% DMSO and 20% acetone.

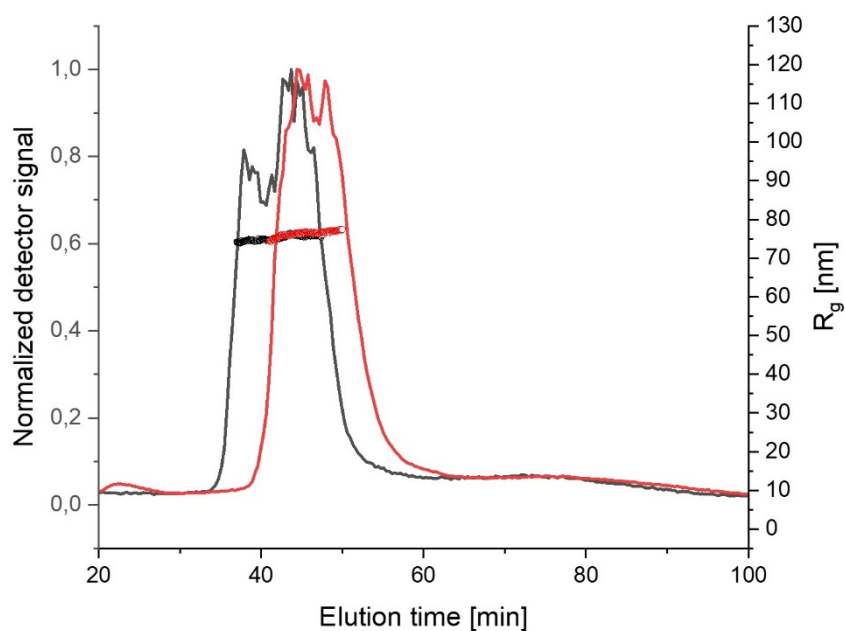

Figure S6: Investigation of stability of worm-like micelles by AF4 measurements (UV 280 nm), directly after assembly: elugram (black line), with according  $R_g$  (black dots) and 1 year after assembly: elugram (red line) with according  $R_g$  (red dots).

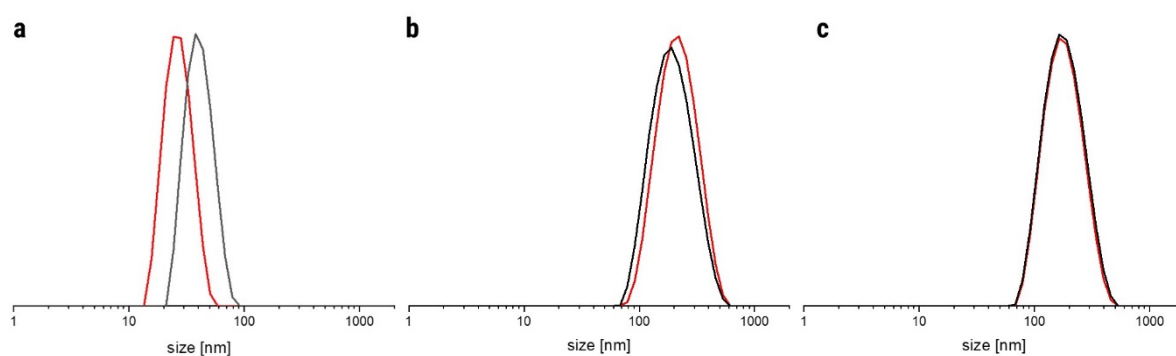

Figure S7: Investigation of stability by DLS measurements of non-crosslinked a) spherical micelles; b) worm-like micelles; c) vesicles; without heating (red) and after heating at 80 °C for one week (black).

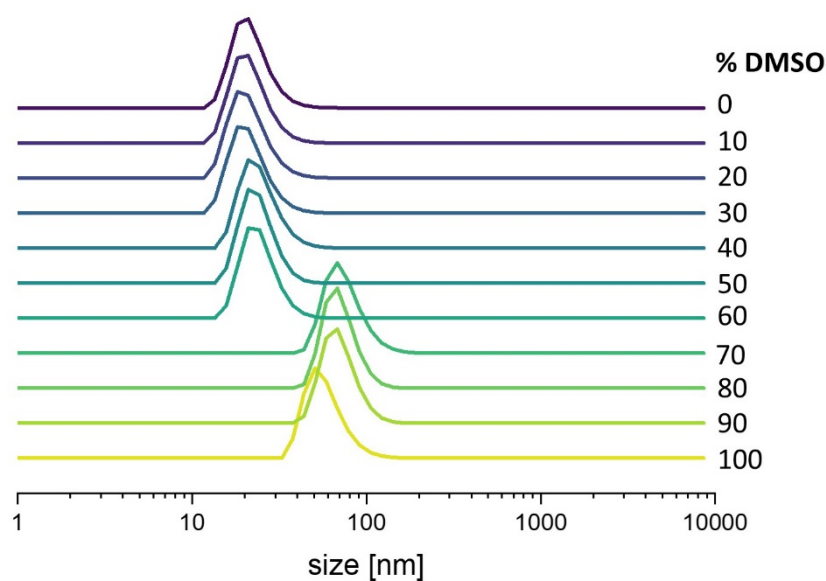

Figure S8: DLS measurements (number PSD), indicating particle size distributions with increasing DMSO content (0% to 100%) in starting solvent composition. Initial polymer concentration: 1 mg/mL, water addition rate: 2 mL/h.

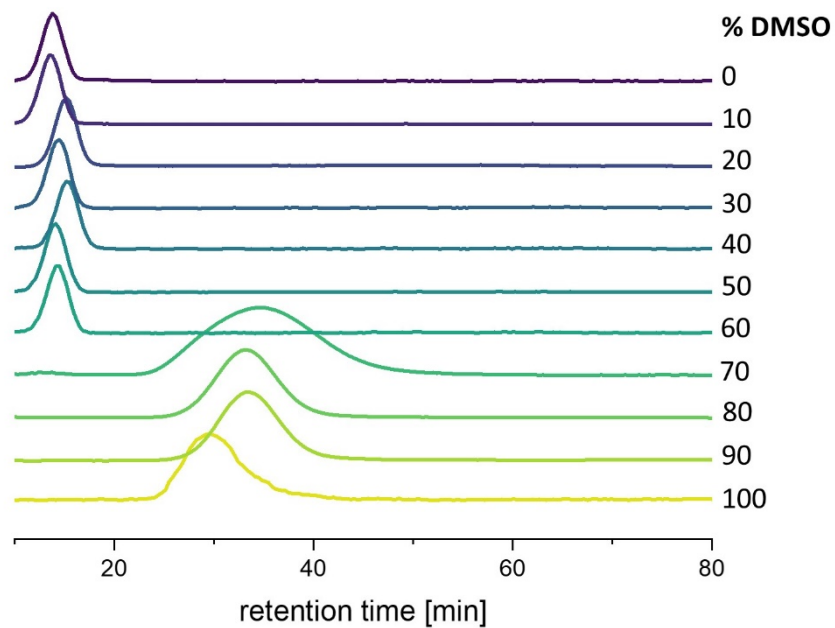

Figure S9: AF4 elugrams (UV detector at 280 nm) with increasing DMSO content (0% to 100%) in starting solvent composition. Initial polymer concentration: 1 mg/mL, water addition rate: 2 mL/h.

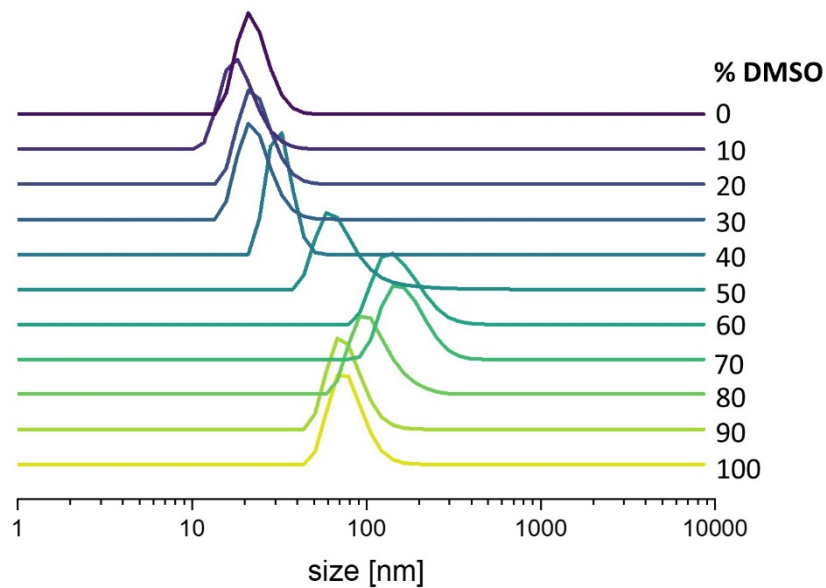

Figure S10: DLS measurements (number PSD), indicating particle size distributions with increasing DMSO content (0% to 100%) in starting solvent composition. Initial polymer concentration: 7 mg/mL, water addition rate: 2 mL/h.

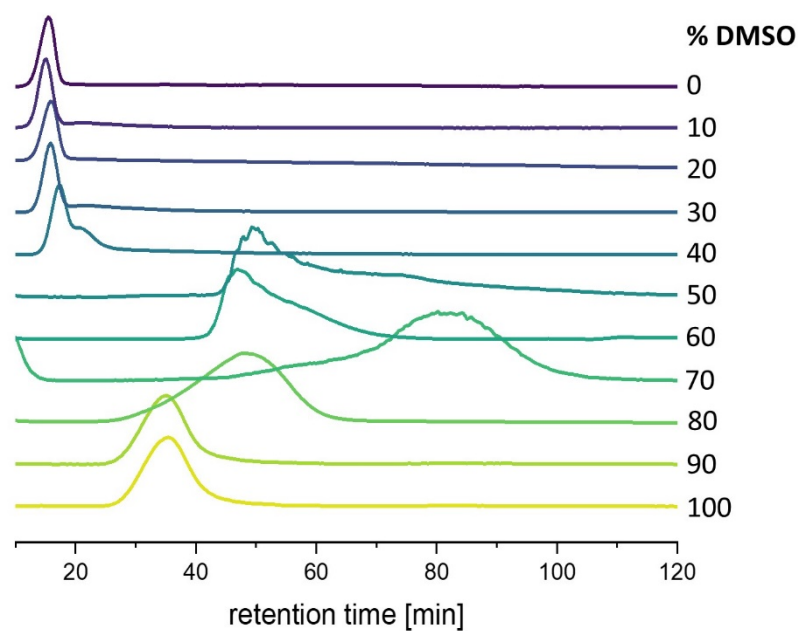

Figure S11: AF4 elugrams (UV detector at 280 nm) with increasing DMSO content (0% to 100%) in starting solvent composition. Initial polymer concentration: 7 mg/mL, water addition rate: 2 mL/h.

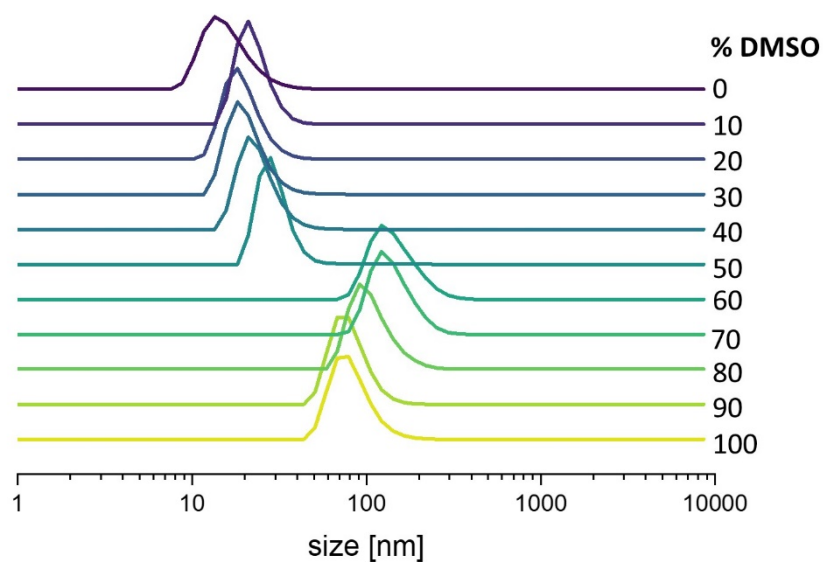

Figure S12: DLS measurements (number PSD), indicating particle size distributions with increasing DMSO content (0% to 100%) in starting solvent composition. Initial polymer concentration: 4 mg/mL, water addition rate: 1 mL/h.

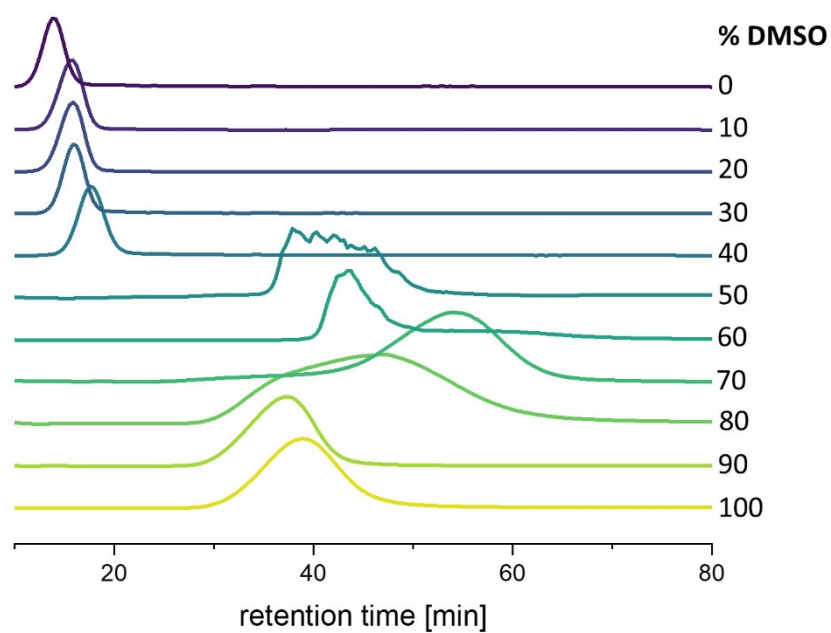

Figure S13: AF4 elugrams (UV detector at 280 nm) with increasing DMSO content (0% to 100%) in starting solvent composition. Initial polymer concentration: 4 mg/mL, water addition rate: 1 mL/h.

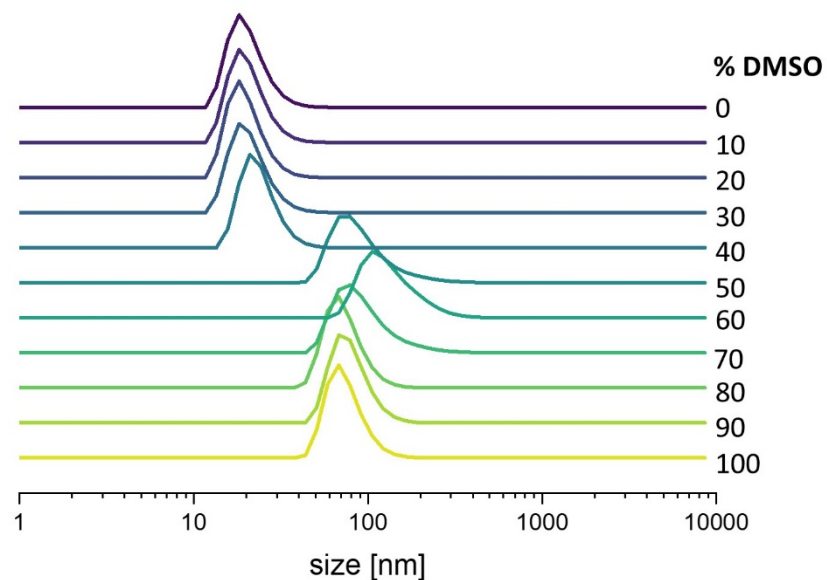

Figure S14: DLS measurements (number PSD), indicating particle size distributions with increasing DMSO content (0% to 100%) in starting solvent composition. Initial polymer concentration: 4 mg/mL, water addition rate: 4 mL/h.



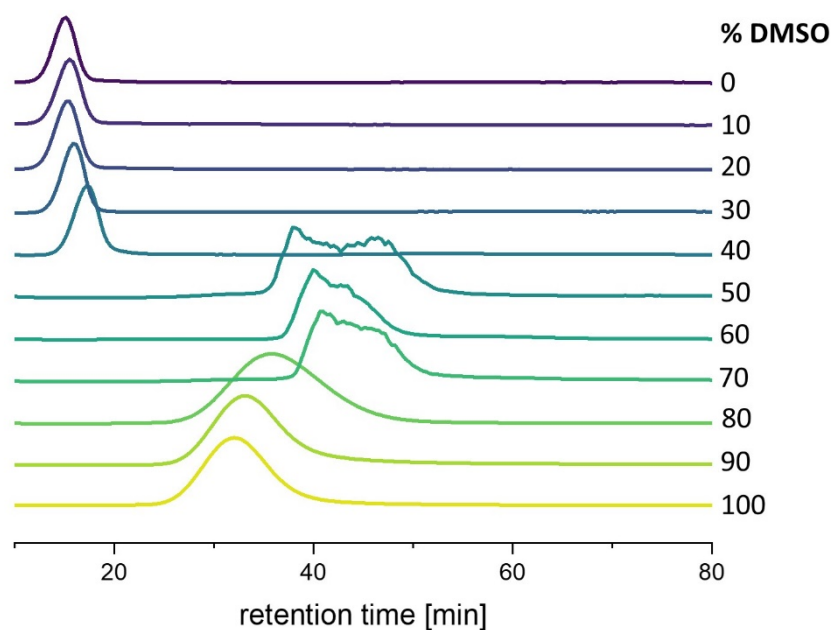

Figure S15: AF4 elugrams (UV detector at 280 nm) with increasing DMSO content (0% to 100%) in starting solvent composition. Initial polymer concentration: 4 mg/mL, water addition rate: 4 mL/h.

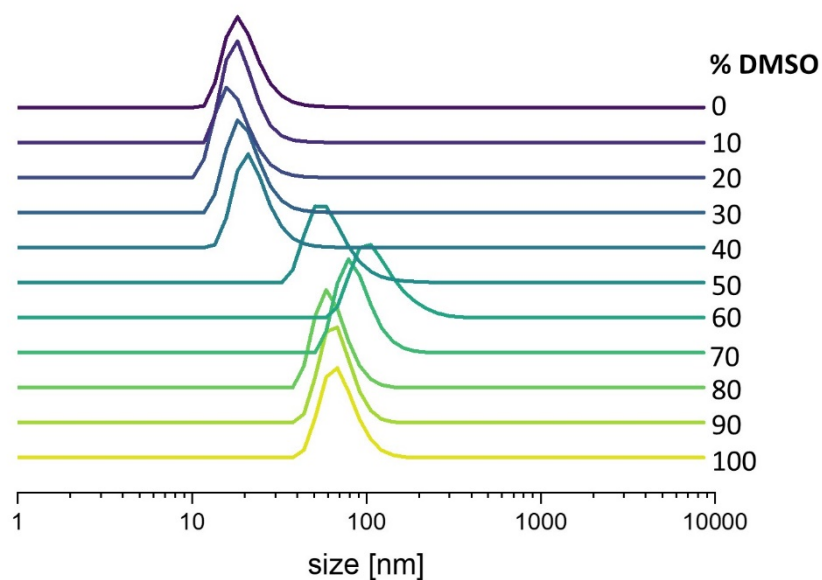

Figure S16: DLS measurements (number PSD), indicating particle size distributions with increasing DMSO content (0% to 100%) in starting solvent composition. Initial polymer concentration: 4 mg/mL, water addition rate: 20 mL/h.

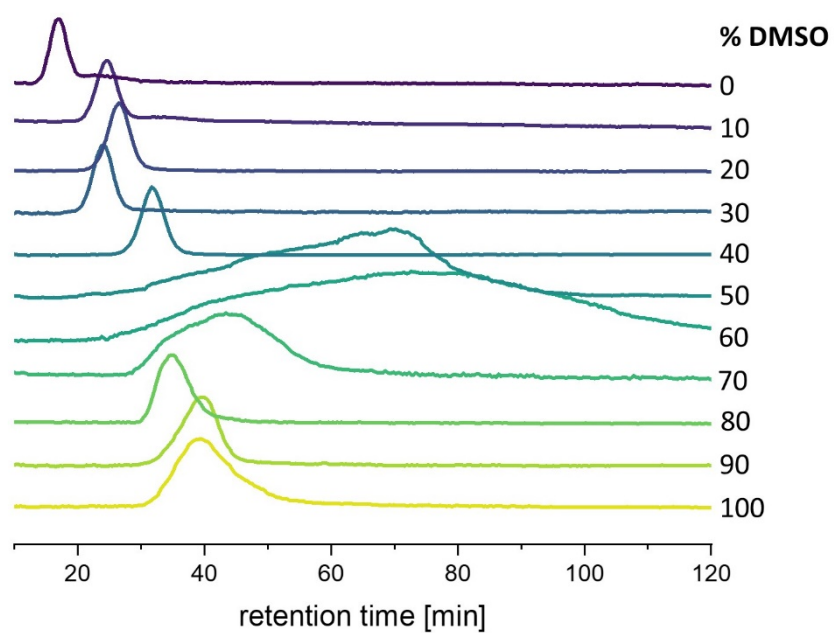

Figure S17: AF4 elugrams (UV detector at 280 nm) with increasing DMSO content (0% to 100%) in starting solvent composition. Initial polymer concentration: 4 mg/mL, water addition rate: 20 mL/h.
